# Supplementary material
Source: PubMed Central journal article supplement (PMC5629973)

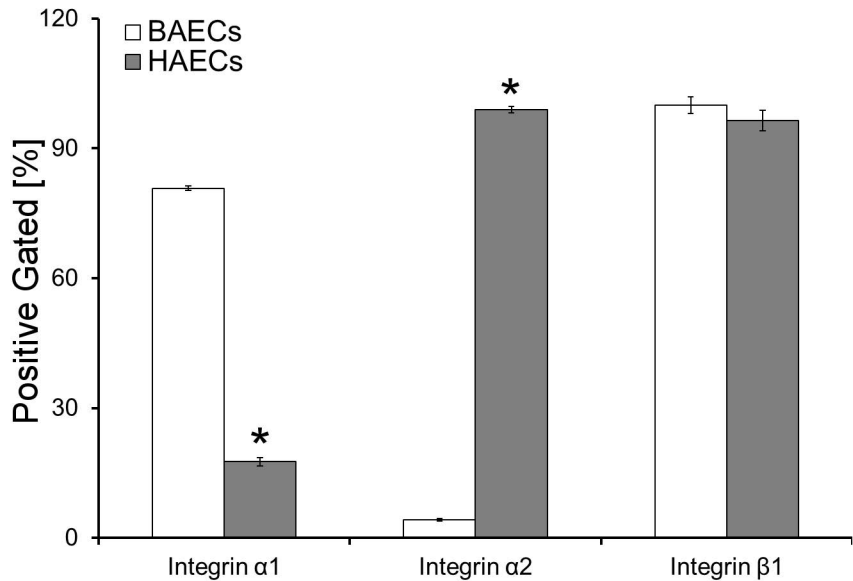

Supplement: NIHMS711592-supplement-ESI_2.pdf [file NIHMS711592-supplement-ESI_2.pdf]
